# Supplementary material for: Effects of sheared chromatin length on ChIP-seq quality and sensitivity
Source: bioRxiv or medRxiv preprint supplement (doi:10.1101/2020.09.30.320697), 2020-09-30
Supplement: Supplementary file [file media-1.pdf]

# Supplemental Figure S1

## Optimization of chromatin shearing for 20M cells

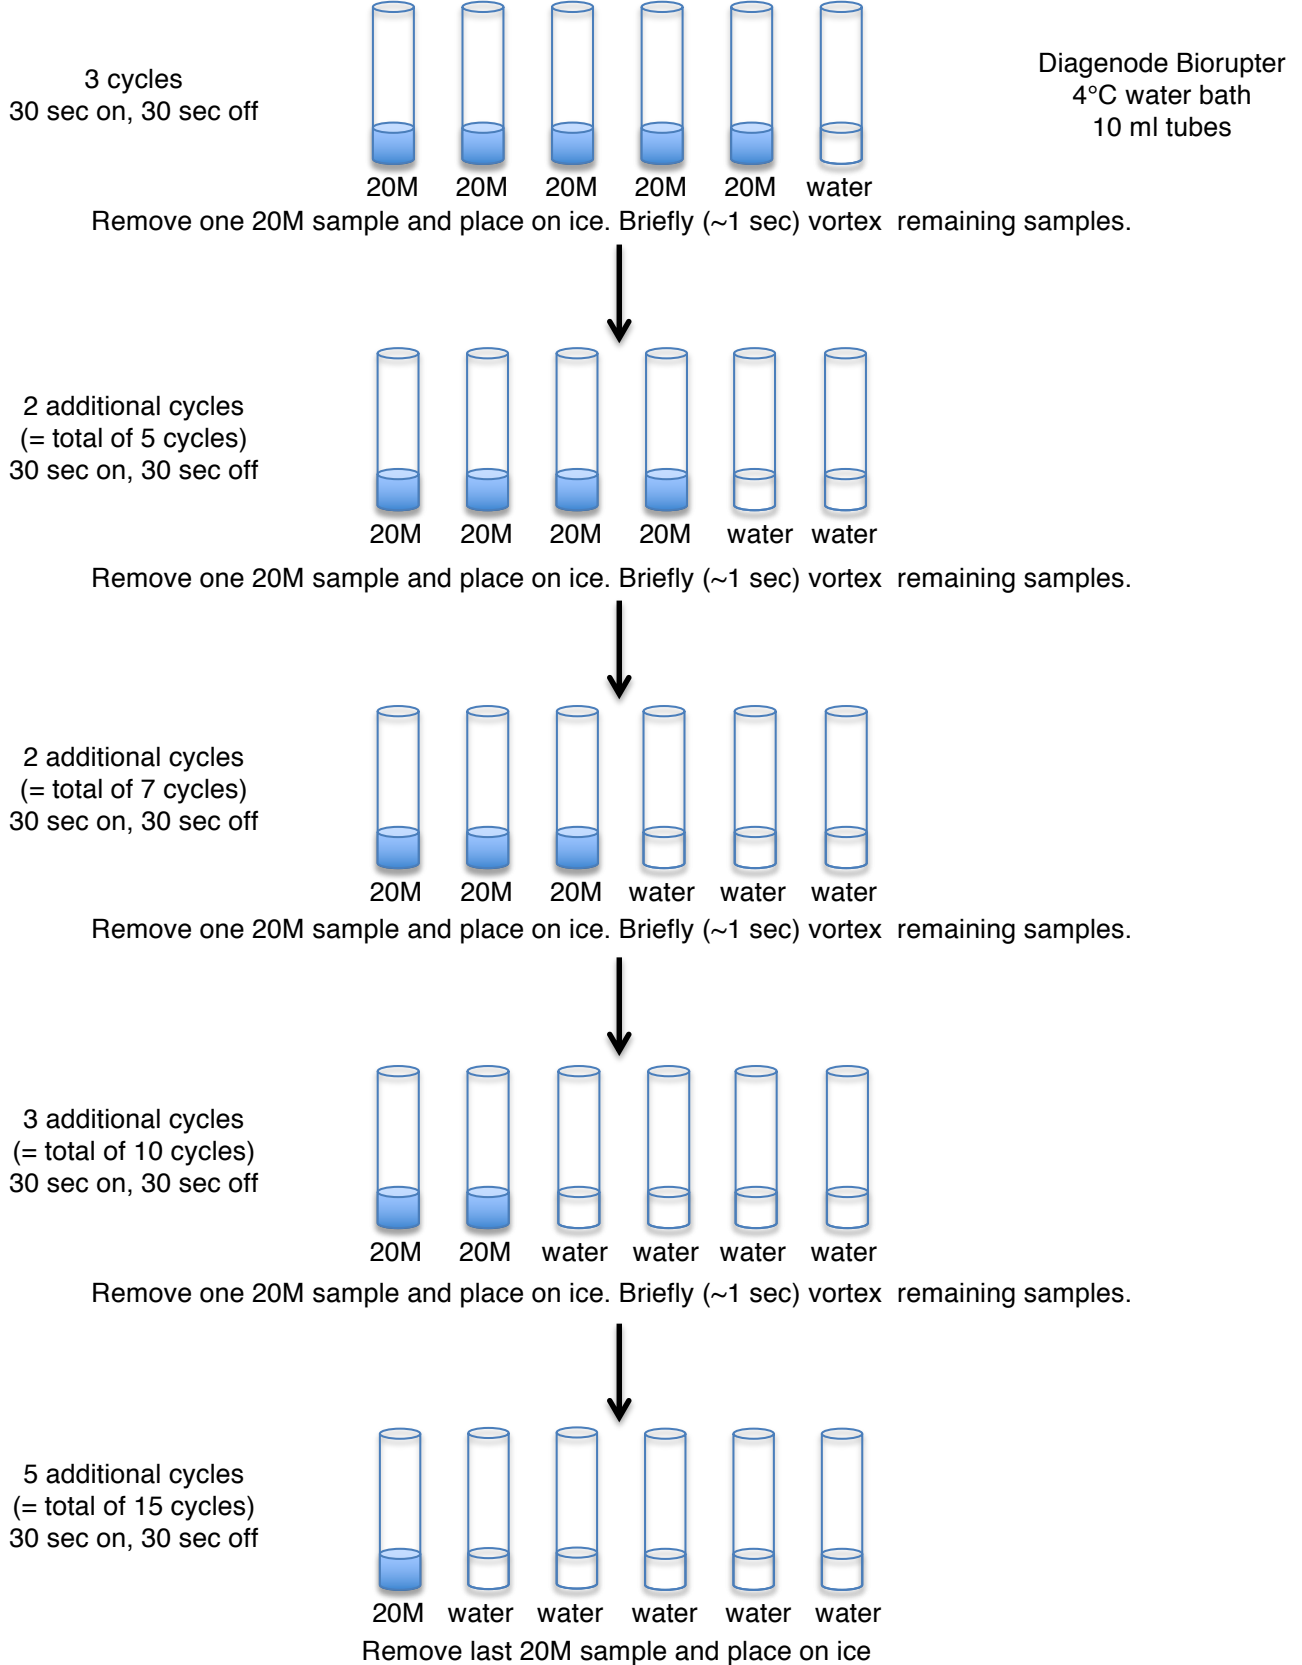

# Supplemental Figure S1 continued

## Optimization of chromatin shearing for 20M cells

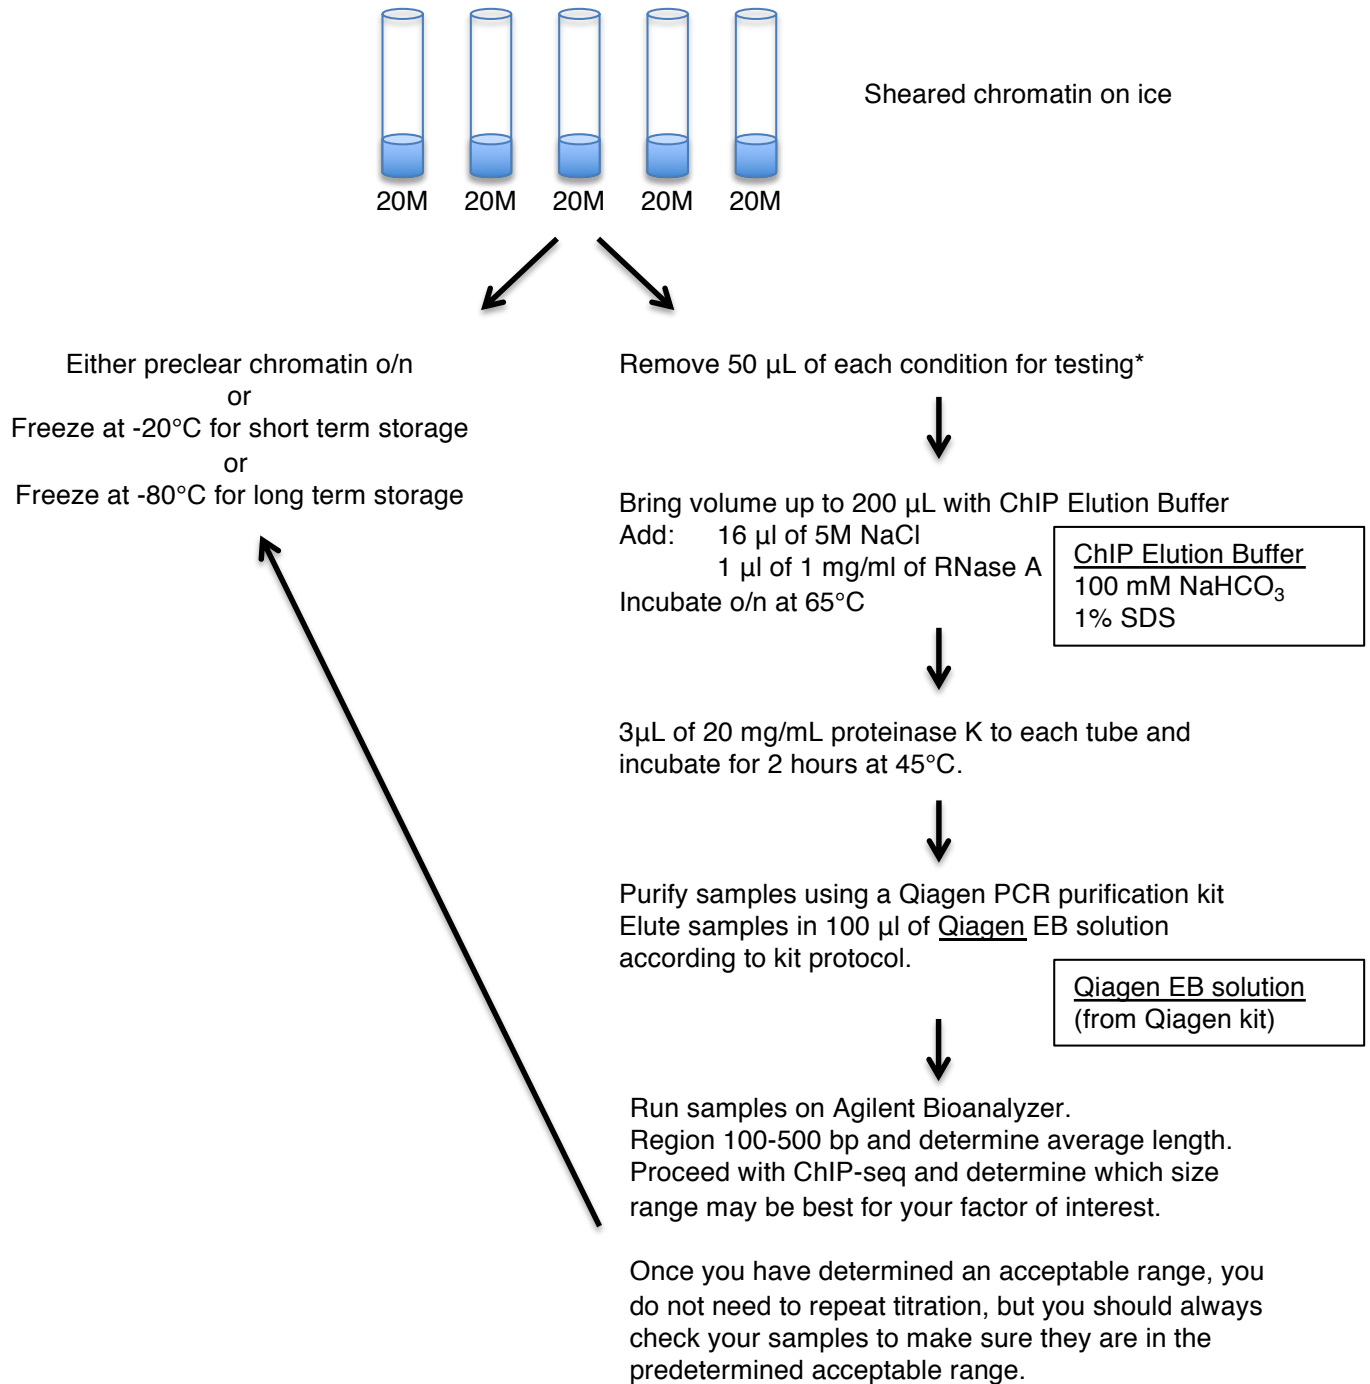

\*You can use less than 50 µl, however, we always increase the volume to 200 µl with ChIP elution buffer and process samples in the same way that we process ChIP samples for reverse cross-linking. If you sample less than 50 µl, please also remember to decrease your elution volume from Qiagen column accordingly.

# Supplemental Figure S2

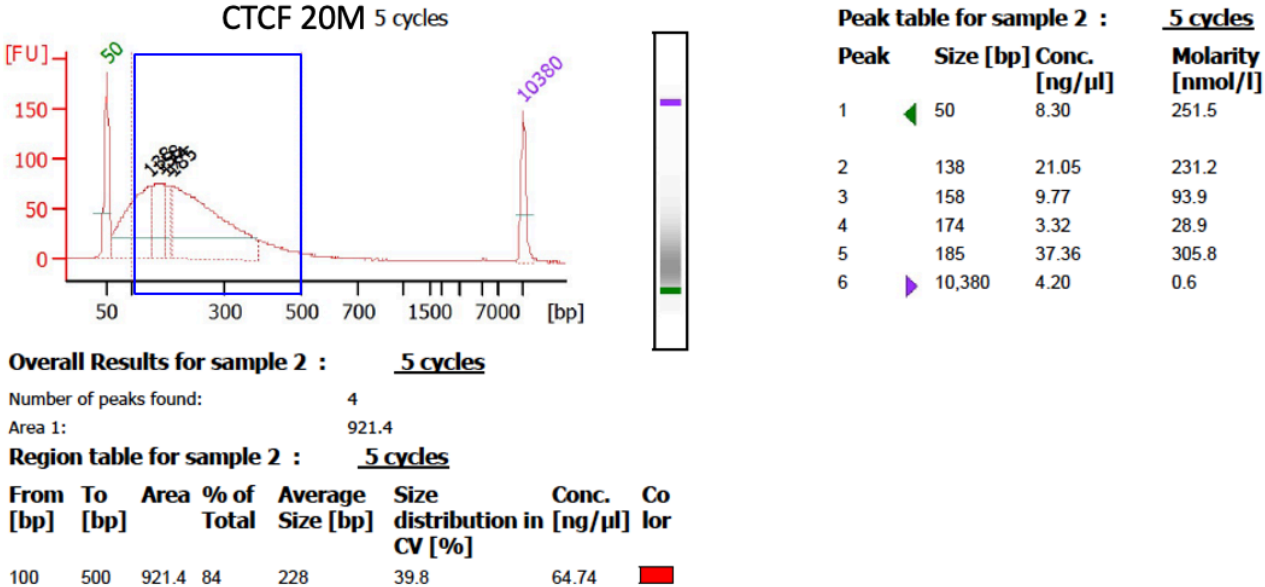

**Supplemental Figure S2:** Representative Agilent Bioanalyzer 2100 tracing of a chromatin sample using an Agilent DNA 7500 kit. Following sonication, the average size of each chromatin sample was determined by measuring the average length within a 100-500 bp window.
